# Supplementary material for: Prevention of acquired sensorineural hearing loss in mice by in vivo Htra2 gene editing
Source: PubMed Central journal article supplement (PMC7983387; doi:10.1186/s13059-021-02311-4), 2021-03-22

**Full unedited blot for Figure S1B**  
**Western blot result: HtrA2/Omi**

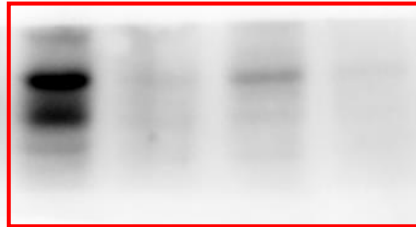

**Full unedited blot for Figure S1B**  
**Western blot result: Actin**

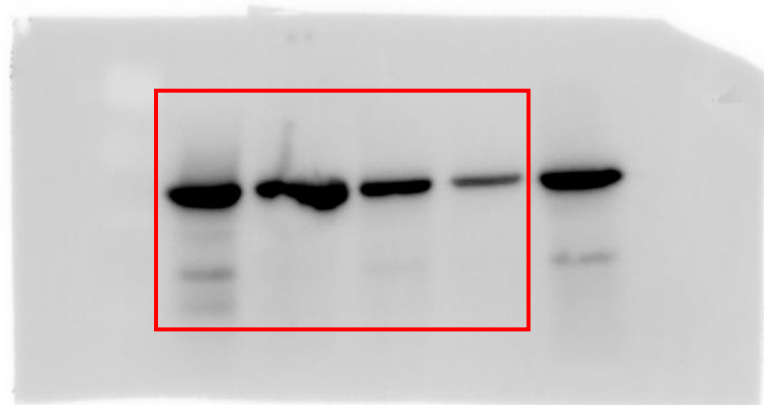

**Full unedited gel for Figure S3F**

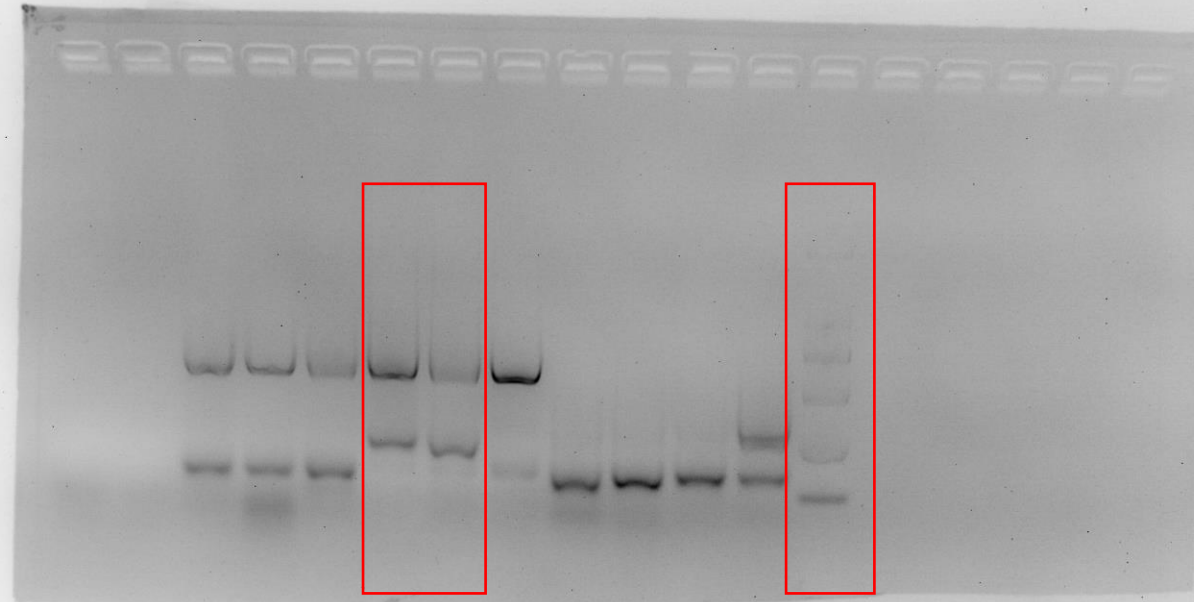

Supplement: 13059_2021_2311_MOESM4_ESM.pdf [file 13059_2021_2311_MOESM4_ESM.pdf]
